# Supplementary material for: Profiling surface glycans on live cells and tissues using quantum dot-lectin nanoconjugates
Source: Royal Society of Chemistry journal article supplement (doi:10.1039/c2lc40248c), 2012-01-01
Supplement: c2lc40248c.pdf [file c2lc40248c.pdf]

## Supplementary Information

### Profiling surface glycans on live cells and tissues using quantum dot-lectin nanoconjugates

Heon-Ho Jeong,<sup>a+</sup> Yun-Gon Kim,<sup>b+</sup> Sung-Chan Jang<sup>a</sup>, Hyunmin Yi,<sup>c</sup> and Chang-Soo Lee<sup>\*a</sup>

<sup>a</sup> Department of Chemical Engineering, Chungnam National University, Yuseong-gu, Daejeon, 305-764, South Korea; E-mail: rhadum@cnu.ac.kr

<sup>b</sup> Department of Chemical Engineering, Soongsil University, 369 Sangdo-Ro, Dongjak-gu, Seoul, 156-743, South Korea

<sup>c</sup> Department of Chemical Engineering, Tufts University, Medford, Massachusetts 02155, U.S.A.

<sup>+</sup> These authors have equally contributed and should be considered first author

**Table S1.** List of lectins used in this study

| Abbreviation | Origin                      | Glycan Specificity                          |
|--------------|-----------------------------|---------------------------------------------|
| SBA          | <i>Glycine max</i>          | N-acetylgalactosamine (N-GalNAc), galactose |
| ConA         | <i>Canavalia ensiformis</i> | $\alpha$ -mannose                           |
| WGA          | <i>Triticum unlgari</i>     | N-acetylglucosamine (N-GlcNAc)              |
| LTL          | <i>Lotus tetragonolobus</i> | $\alpha$ -linked L-fucose, Sia-Lex, Lex     |
| SNA          | <i>Sambucus nigra</i>       | Sia( $\alpha$ -2,6)Gal/ GalNAc              |
| MAA          | <i>Maackia amurensis</i>    | Sia( $\alpha$ -2,3)Gal                      |

**Table S2.** List of cell line.

| Designations | Origin | Morphology      | Organ      | Disease                   |
|--------------|--------|-----------------|------------|---------------------------|
| MCF-7        | Human  | Epithelial      | Breast     | Adenocarcinoma            |
| HEK293       | Human  | Epithelial      | Kidney     | None                      |
| ACHN         | Human  | Epithelial      | Kidney     | Renal cell adenocarcinoma |
| A549         | Human  | Epithelial      | Lung       | Carcinoma                 |
| HeLa         | Human  | Epithelial      | Cervix     | Adenocarcinoma            |
| HCT116       | Human  | Epithelial      | Colon      | Colorectal carcinoma      |
| HepG2        | Human  | Epithelial      | Liver      | Hepatocellular carcinoma  |
| HDF          | Human  | Fibroblast-like | Epithermis | None                      |

**Table S3.** Information of breast cancer tissue specimen

| No. | Age | Sex | Organ  | Diagnosis                   | pTNM    | Stage |
|-----|-----|-----|--------|-----------------------------|---------|-------|
| 1   | 37  | F   | Breast | Infiltrating duct carcinoma | T2N0M0  | II A  |
| 2   | 48  | F   | Breast | Infiltrating duct carcinoma | T2N3aM0 | III C |
| 3   | 36  | F   | Breast | Infiltrating duct carcinoma | T3N0M0  | II B  |
| 4   | 40  | F   | Breast | Infiltrating duct carcinoma | T2N0M0  | II A  |
| 5   | 51  | F   | Breast | Infiltrating duct carcinoma | T2N0M0  | II A  |
| 6   | 54  | F   | Breast | Infiltrating duct carcinoma | T2N0M0  | II A  |
| 7   | 43  | F   | Breast | Infiltrating duct carcinoma | T2N0M0  | II A  |
| 8   | 58  | F   | Breast | Infiltrating duct carcinoma | T2N3aM0 | III C |
| 9   | 37  | F   | Breast | Infiltrating duct carcinoma | T2N3aM0 | III C |

**Table S4.** The stage of breast cancer tissue

| Stage | T     | N  | M  |
|-------|-------|----|----|
| II A  | T0-T2 | N0 | M0 |
| II B  | T2    | N1 | M0 |
|       | T3    | N0 | M0 |
| III C | Any T | N3 | M0 |

**T : Primary tumor stage**

**T0** : No evidence of primary tumor

**T1** : Tumor  $\leq 20$  mm in greatest dimension

**T2** : Tumor  $\geq 20$  mm but  $\leq 50$  mm in greatest dimension

**T3** : Tumor  $> 50$  mm in greatest dimension

**N : Regional lymph nodes stage**

**N0** : No regional lymph node metastasis identified histologically.

**N1** : Micrometastases; or metastases in 1-3 axillary lymph nodes; and/or in internal mammary nodes with metastases detected by sentinel lymph node biopsy but not clinically detected.

**N2** : Metastasis in 4-9 axillary nodes; or in clinically detected internal mammary lymph nodes in the absence of axillary lymph node metastasis.

**N3** : Metastasis in 10 or more axillary lymph nodes, or in infraclavicular (level III axillary) lymph nodes, or in clinically detected ipsilateral internal mammary lymph nodes in the presence of 1 or more positive level I, II axillary lymph nodes; or in more than 3 axillary lymph nodes and in internal mammary lymph nodes with micrometastases or macrometastases detected by sentinel lymph node biopsy but not clinically detected/or in ipsilateral supraclavicular lymph nodes

**N3a** : Metastasis in 10 or more axillary lymph nodes (at least one tumor deposit greater than 2.0 mm); or metastases to the infraclavicular (level III axillary) node.

**M : Distant metastasis stage**

**M0** : No clinical or radiographic evidence of distant metastases.

**M1** : Distant detectable metastases as determined by classic clinical and radiographic means and/or histologically proven larger than 0.2 mm.

**Table S5.** Information of colon cancer tissue

| No. | Age | Sex | Organ         | Diagnosis                                 | pTNM     | Stage |
|-----|-----|-----|---------------|-------------------------------------------|----------|-------|
| 1   | 44  | M   | Rectum        | Adenocarcinoma, moderately differentiated | T3N2aM1a | IV A  |
| 2   | 47  | F   | Sigmoid colon | Adenocarcinoma, moderately differentiated | T3N1bM1b | IV B  |
| 3   | 64  | M   | Sigmoid colon | Adenocarcinoma, well differentiated       | T3N1aM0  | III B |
| 4   | 67  | M   | Colon         | Mucinous adenocarcinoma                   | T2N2bM0  | III C |
| 5   | 60  | M   | Rectum        | Adenocarcinoma, moderately differentiated | T3N0M0   | II A  |
| 6   | 59  | M   | Colon         | Adenocarcinoma, well differentiated       | T3N0M0   | II A  |
| 7   | 58  | F   | Rectum        | Adenocarcinoma, moderately differentiated | T3N2bM0  | III C |
| 8   | 64  | M   | Rectum        | Adenocarcinoma, moderately differentiated | T3N2aM0  | III B |
| 9   | 68  | M   | Colon         | Mucinous carcinoma                        | T4aN1bM0 | III B |

**Table S6.** The stage of colon cancer tissue

| Stage | T      | N      | M   |
|-------|--------|--------|-----|
| II A  | T3     | N0     | M0  |
| III B | T3-T4a | N1/N1c | M0  |
|       | T2-T3  | N2a    |     |
|       | T1-T2  | N2b    |     |
| III C | T4a    | N2a    | M0  |
|       | T3-T4a | N2b    |     |
|       | T4b    | N1-N2  |     |
| IV A  | Any T  | Any N  | M1a |
| IV B  | Any T  | Any N  | M1b |

**T : Primary tumor stage**

**T0** : Primary tumor cannot be assessed

**T1** : Tumor invades submucosa

**T2** : Tumor invades muscularis propria

**T3** : Tumor invades through the muscularis propria into pericolorectal tissues

**T4a** : Tumor penetrates to the surface of the visceralperitoneum

**T4b** : Tumor directly invades or is adherent to other organs or structures

**N : Regional lymph nodes stage**

**N0** : No regional lymph node metastasis

**N1** : Metastasis in 1-3 regional lymph nodes

**N1a** : Metastasis in one regional lymph node

**N1b** : Metastasis in 2-3 regional lymph nodes

**N2** : Metastasis in four or more regional lymph nodes

**N2a** : Metastasis in 4-6 regional lymph nodes

**N2b** : Metastasis in seven or more regional lymph nodes

**M** : Distant metastasis stage

**M0** : No distant metastasis

**M1** : Distant metastasis

**M1a** : Metastasis confined to one organ or site (e.g., liver, lung, ovary, nonregional node)

**M1b** : Metastases in more than one organ/site or the peritoneum

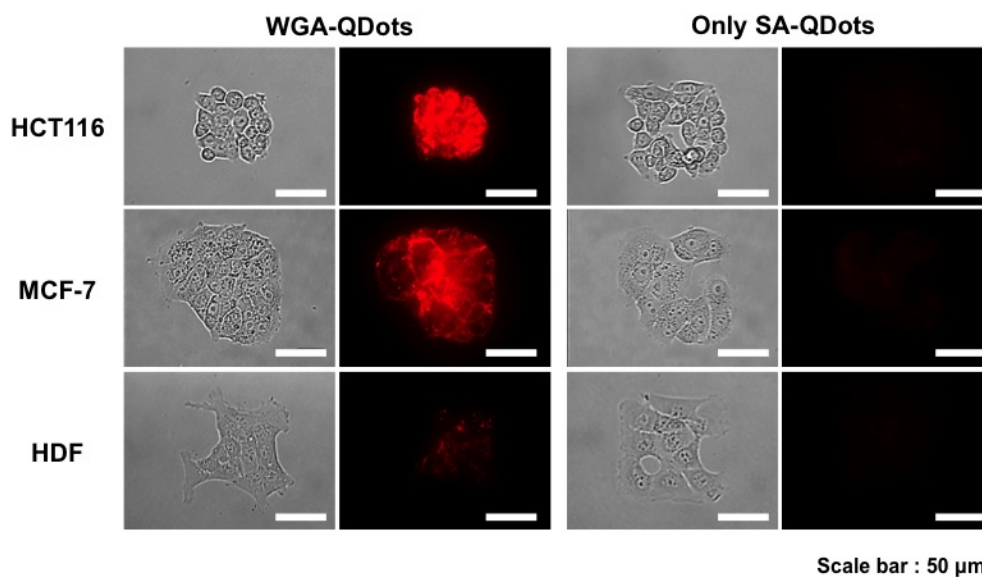

**Figure S1.** The investigation of non-specific binding with streptavidin-QDots (SA-Qdots) and comparison of fluorescence images between WGA-Qdots and only SA-Qdots..

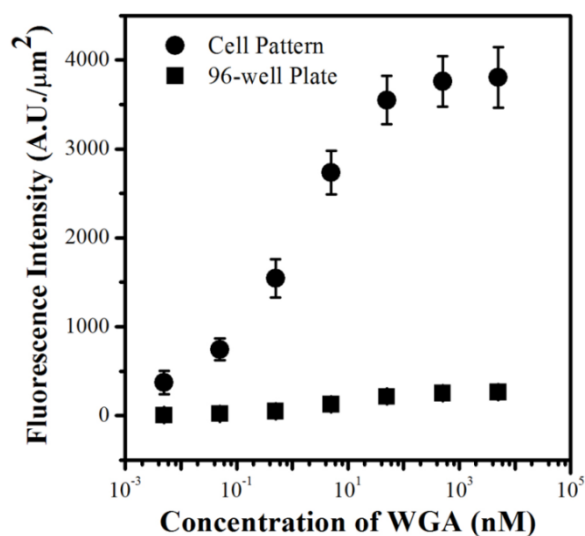

**Figure S2.** Comparison of cell pattern approach with conventional 96-well plate method. MCF-7 are incubated with various concentration of WGA.

(a)

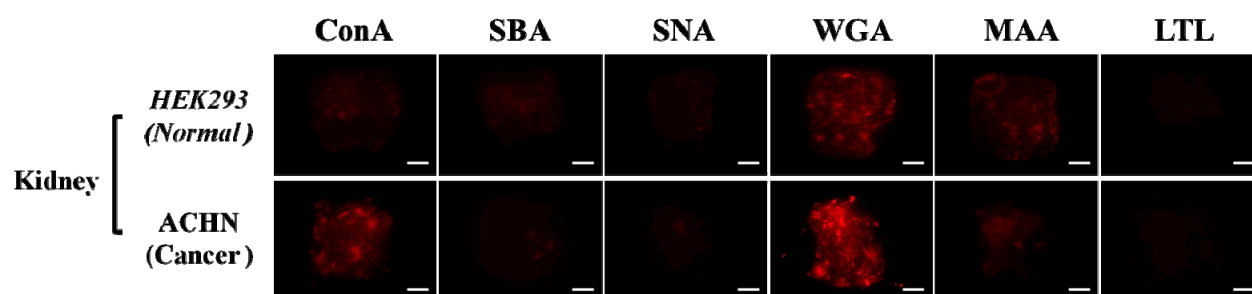

(b)

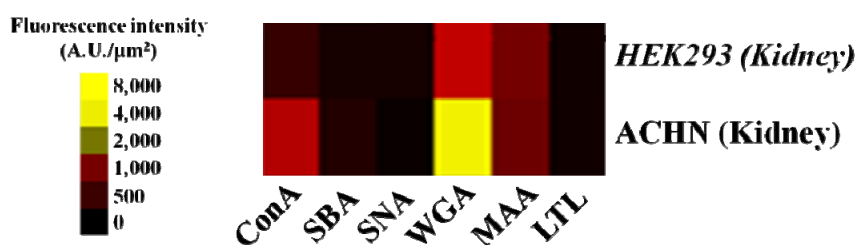

**Figure S3.** Binding profile of kidney cancer cell (ACHN) and normal kidney cell (HEK293) to 6 lectins. One representative cell pattern for each lectin and cell line is selected. (a) Representative fluorescence images of HEK293 and ACHN cell line. Scale bars indicate 40  $\mu\text{m}$ . (b) Heat map with hierarchical clustering for the 6 types of lectins examined.

Figure S3 shows distinctive binding patterns of both ACHN and HEK293. ConA (3 folds,  $p < 0.01$ ) and WGA (2 folds,  $p < 0.01$ ) show strong signal intensity against the cancer ACHN cell line, although SBA, SNA, and LTL also exhibit similar fluorescence intensity. This result suggests that mannose and GlcNAc are over-expressed on ACHN cells compared to HEK293.
